# Supplementary material for: miR-140 inhibits osteosarcoma progression by impairing USP22-mediated LSD1 stabilization and promoting p21 expression
Source: PubMed Central journal article supplement — Mol Ther Nucleic Acids. 2021 Feb 3;24:436–48. doi: 10.1016/j.omtn.2021.01.029 (PMC8040122; doi:10.1016/j.omtn.2021.01.029), 2021-02-03
Supplement: mmc1.pdf [file mmc1.pdf]

**OMTN, Volume 24**

**Supplemental information**

**miR-140 inhibits osteosarcoma progression  
by impairing USP22-mediated LSD1 stabilization  
and promoting p21 expression**

**Wei Liu, Dunwei Wang, Lidi Liu, Lin Wang, and Ming Yan**

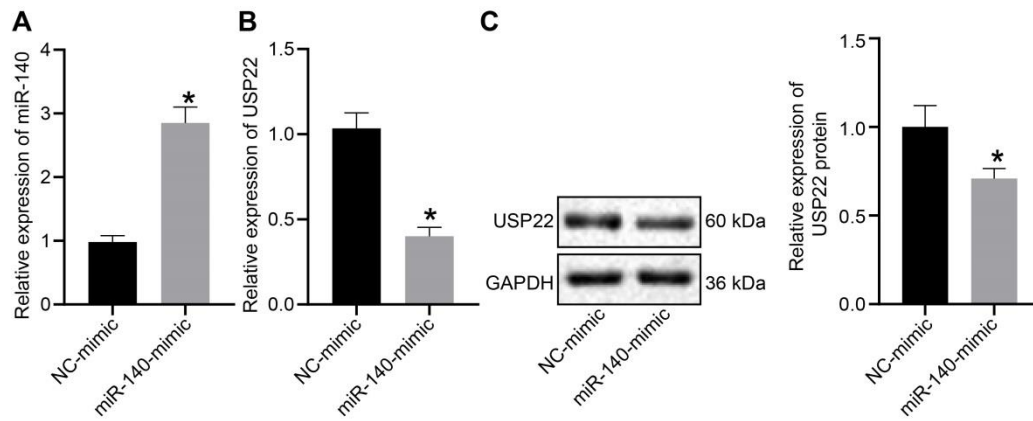

**Figure S1.** miR-140 inhibits the expression of USP22 in U2OS cells.

A, miR-140 expression in U2OS cells transfected with miR-140 mimic detected by RT-qPCR. B, USP22 expression in U2OS cells transfected with miR-140 mimic detected by RT-qPCR. C, USP22 protein expression in U2OS cells transfected with miR-140 mimic detected by Western blot. \*  $p < 0.05$  compared with U2OS cells transfected with NC mimic by unpaired  $t$ -test. Cell experiment was repeated three times.

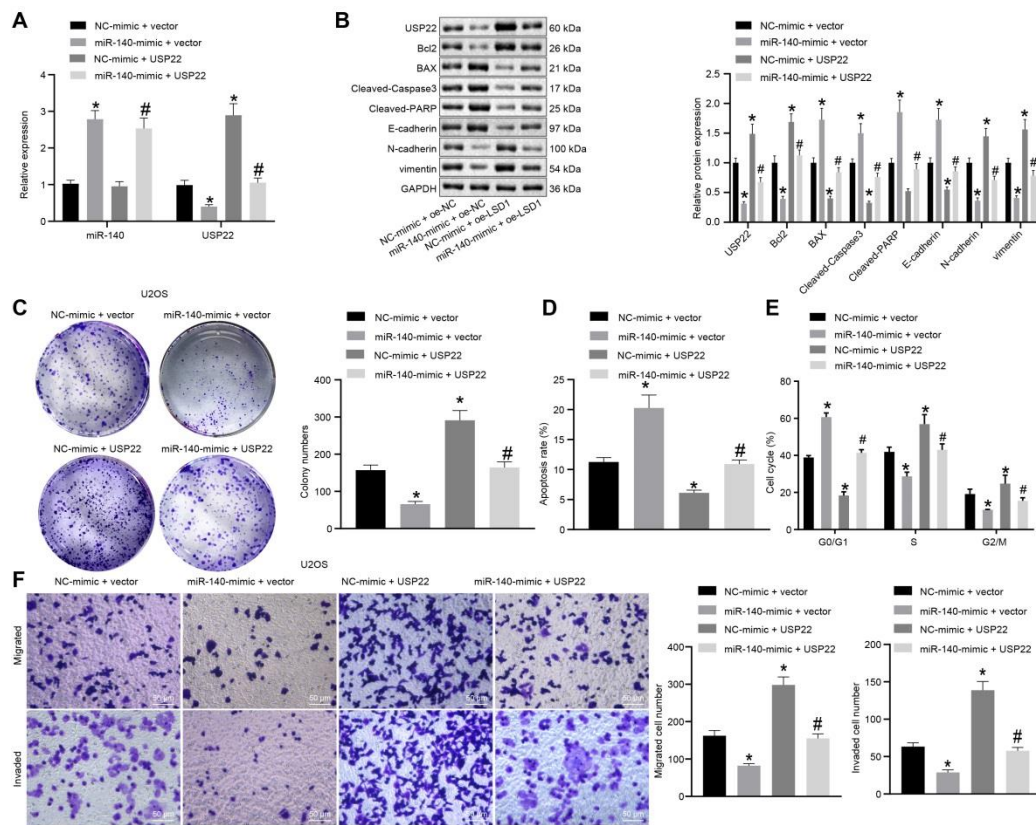

**Figure S2.** Overexpression of miR-140 inhibits cell migration, invasion and proliferation of U2OS cells.

A, Expression of miR-140 and USP22 in U2OS cells transfected with miR-140 mimic, USP22 or both examined using RT-qPCR. B, USP22, Bcl2, Bax, cleaved-caspase3, cleaved-PARP, E-cadherin, N-cadherin and vimentin expression in U2OS cells transfected with miR-140 mimic, USP22 or both examined using Western blot. C, D and E, Cell proliferation (C), apoptosis (D) and cycle (E) analysis in U2OS cells transfected with miR-140 mimic, USP22 or both evaluated using colony formation assay and flow cytometry, respectively. F, Invasion and migration of U2OS cells transfected with miR-140 mimic, USP22 or both assessed using Transwell assay (200 ×). \*  $p < 0.05$  compared with U2OS cells transfected with both NC mimic and empty vector. #  $p < 0.05$  compared with U2OS cells transfected with both miR-140 mimic and empty vector. Comparison of data among multiple groups is analyzed by one-way ANOVA. Each experiment was repeated three times.

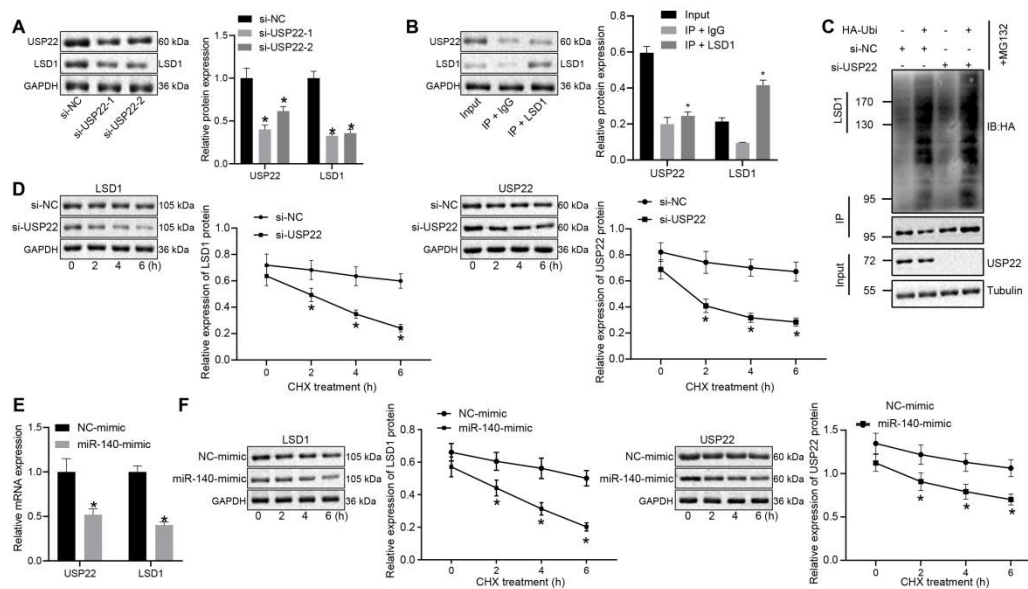

**Figure S3.** USP22 suppresses LSD1 ubiquitination and degradation in U2OS cells.

A, USP22 and LSD1 expression in U2OS cells transfected with si-USP22-1 or si-USP22-2 detected using Western blot. B, Interaction of USP22 with LSD1 in U2OS cells determined using Co-IP. C, Effects of USP22 knockdown on LSD1 ubiquitination in U2OS cells examined using Co-IP. D, Effects of USP22 knockdown on LSD1 protein stability in CHX-treated U2OS cells. E, Protein expression of USP22 and LSD1 in U2OS cells transfected with miR-140 mimic evaluated using Western blot. F, Effects of overexpressed miR-140 on LSD1 protein stability in CHX-treated U2OS cells. \*  $p < 0.05$  compared with U2OS cells treated with si-NC or NC mimic. Data between two groups were compared using unpaired *t*-test. Data among multiple groups were analyzed using one-way ANOVA, while data at different time points were compared using repeated measures ANOVA. Cell experiment was repeated for three times.

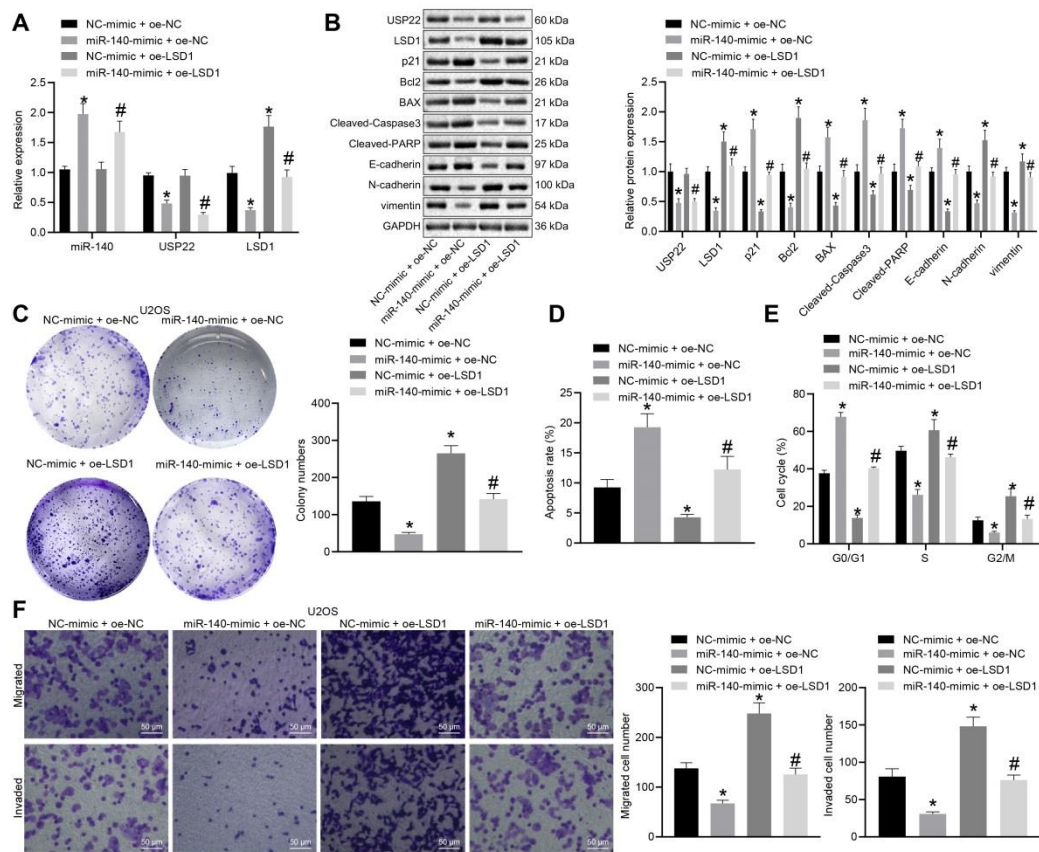

**Figure S4.** Poor p21 expression and amplified LSD1 expression in osteosarcoma tissues.

A, mRNA expression of p21 and LSD1 detected by RT-qPCR in osteosarcoma tissues (n = 65). B, Protein expression of p21 and LSD1 detected by Western blot in osteosarcoma tissues (n = 65). \*  $p < 0.05$  compared with adjacent normal tissues by paired  $t$ -test.

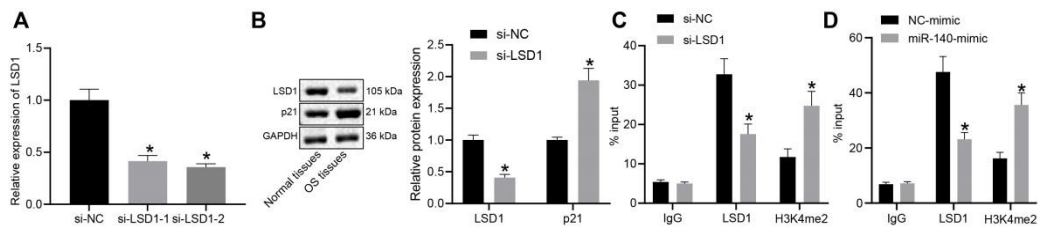

**Figure S5.** miR-140 suppresses U2OS cell proliferation, migration and invasion by downregulating LSD1 *via* USP22.

A, Expression of miR-140, USP22 and LSD1 in HOS cells transfected with miR-140-mimic, oe-LSD1 or both detected using RT-qPCR. B, Protein expression of Bcl2, BAX, cleaved-caspase3, cleaved-PARP, E-cadherin, N-cadherin and vimentin in U2OS cells transfected with miR-140-mimic, oe-LSD1 or both assessed using Western blot. C, Evaluation of U2OS cell proliferation using the colony formation assay upon transfection with miR-140-mimic, oe-LSD1 or both. D and E, U2OS cell apoptosis (D) and cell cycle (E) assessed using flow cytometry upon transfection with miR-140-mimic, oe-LSD1 or both. F, Transwell assay examining U2OS cell invasion and migration upon transfection with miR-140-mimic, oe-LSD1 or both (200 ×). \*  $p < 0.05$  compared with U2OS cells transfected with both NC-mimic and oe-NC. #  $p < 0.05$  compared with U2OS cells transfected with both miR-140-mimic and oe-NC. Data comparison among multiple groups is analyzed by one-way ANOVA. Each experiment was repeated three times.

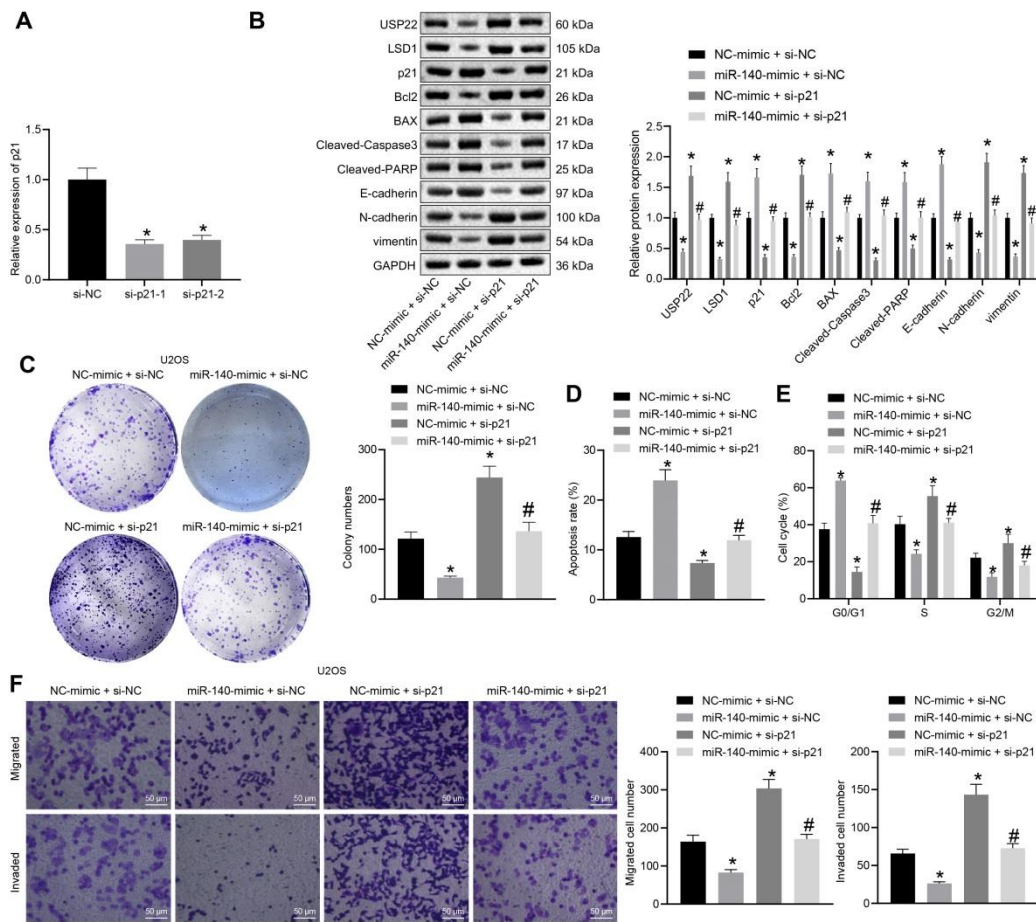

**Figure S6.** miR-140 enhances p21 H3K4me2 methylation through the USP22/LSD1 axis in U2OS cells.

A, RT-qPCR analysis of LSD1 expression in U2OS cells transfected with si-LSD1-1 or si-LSD1-2. B, Western blot for LSD1 and p21 expression in U2OS cells transfected with si-LSD1. C, ChIP detection of H3K4me2 enrichment and the presence of LSD1 on the p21 promoter region in U2OS cells transfected with si-LSD1. D, Effects of miR-140 overexpression on the enrichment of H3K4me2 and LSD1 on the p21 promoter region in U2OS cells. \*  $p < 0.05$  compared with U2OS cells transfected with si-NC or NC-mimic. The data comparison between two groups is analyzed by unpaired  $t$  test. The comparison among multiple groups is analyzed by one-way ANOVA. Each experiment was repeated three times.

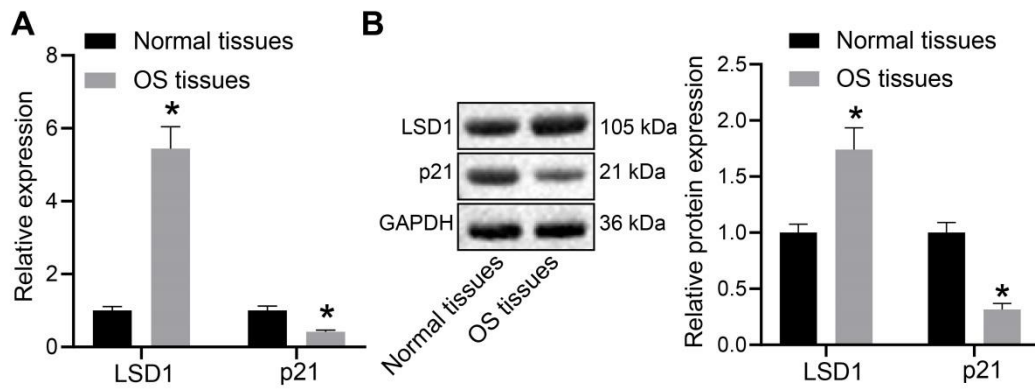

**Figure S7.** miR-140 hinders the malignant phenotypes of U2OS cells *via* p21 upregulation.

A, Silencing efficiency of siRNA targeting p21 detected by RT-qPCR in U2OS cells. B, Protein expression of p21, USP22, LSD1, Bcl2, BAX, cleaved-caspase3, cleaved-PARP, E-cadherin, N-cadherin and vimentin detected by Western blot in U2OS cells transfected with miR-140 mimic, si-p21 or both. C, D, and E, Analysis of proliferation (C), apoptosis (D) and cell cycle stage (E) of U2OS cells transfected with miR-140 mimic, si-p21 or both using the colony formation assay and flow cytometry. F, Transwell assay examining U2OS cell invasion and migration upon transfection with miR-140 mimic, si-p21 or both (200 ×). \*  $p < 0.05$  compared with U2OS cells transfected with si-NC or NC-mimic. #  $p < 0.05$  compared with U2OS cells transfected with miR-140-mimic and si-NC. Comparison of data among multiple groups is analyzed by one-way ANOVA. Each experiment was repeated three times.



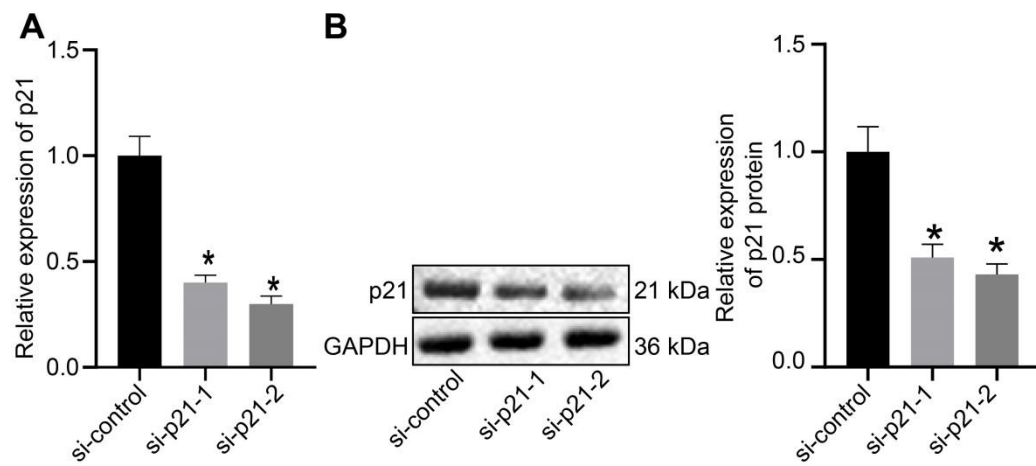

**Figure S8.** Transfection efficiency of shRNAs targeting p21.

A, p21 mRNA expression detected by RT-qPCR. B, p21 protein expression detected by Western blot. \*  $p < 0.05$  compared with sh-control by unpaired  $t$ -test.
